# Supplementary material
Source: PubMed Central journal article supplement (PMC4222852)

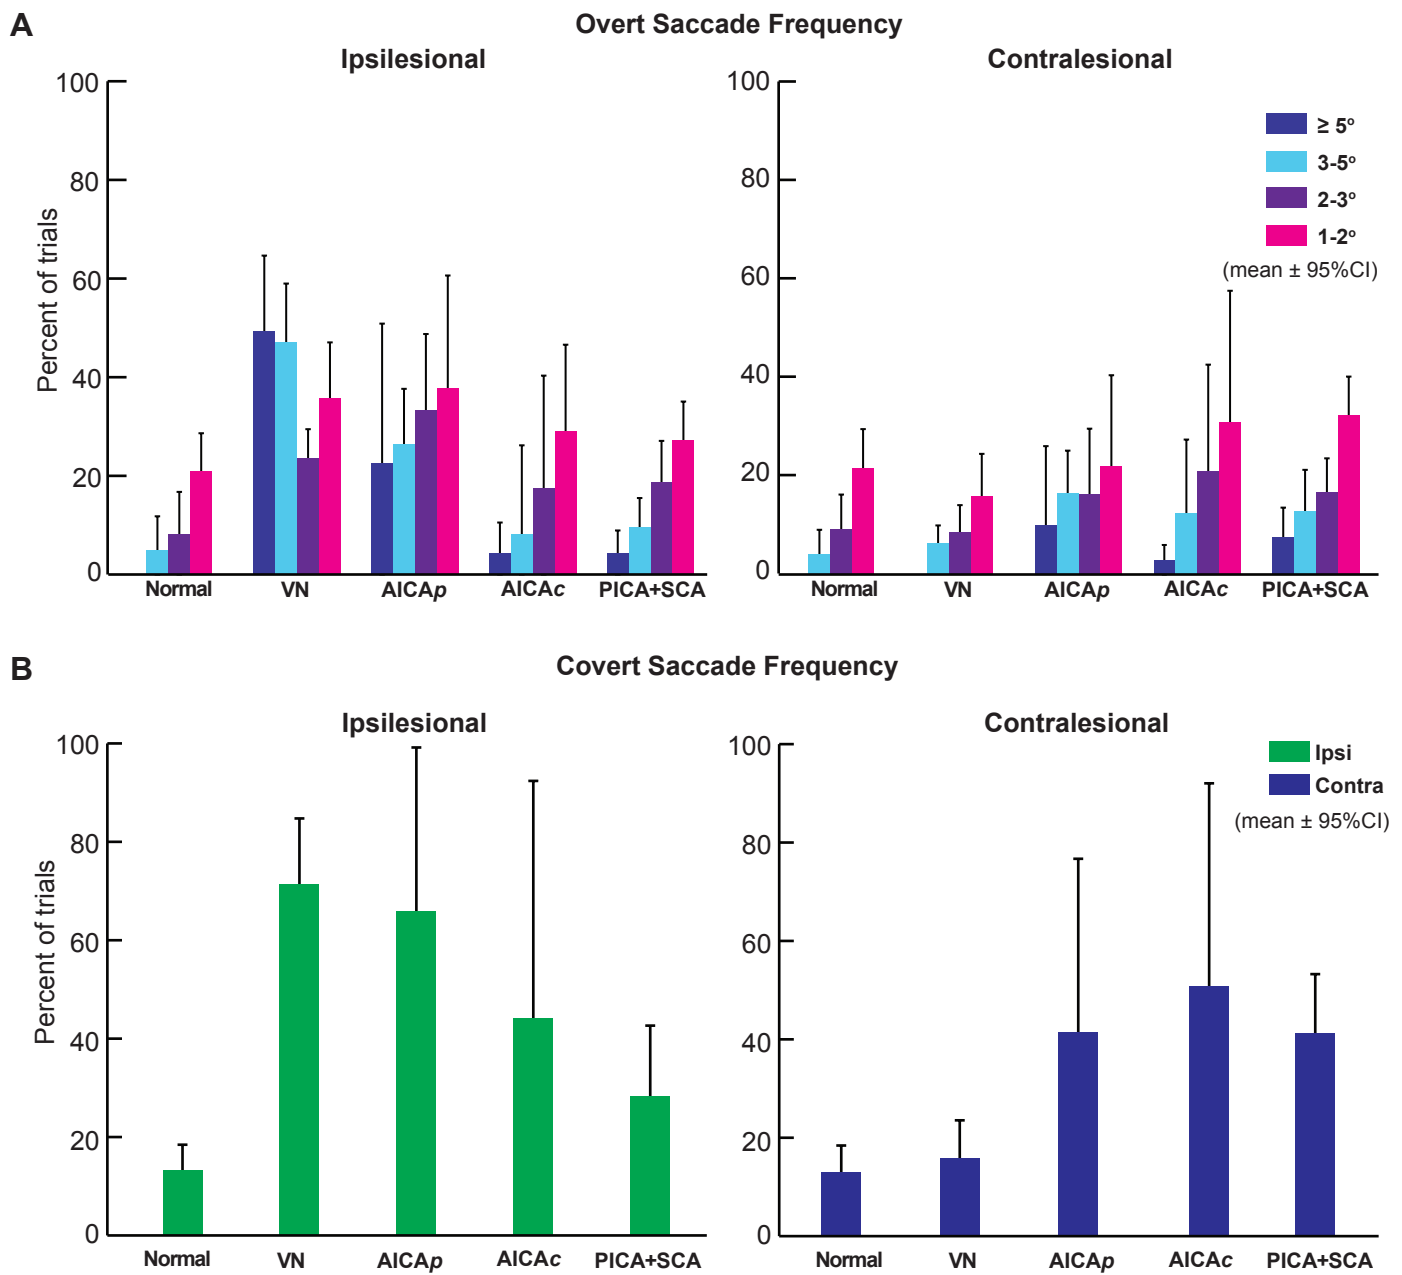

**FIGURE e-2**

Supplement: supp_WNL.0000000000000906_Figure_e-2.pdf [file supp_WNL.0000000000000906_Figure_e-2.pdf]

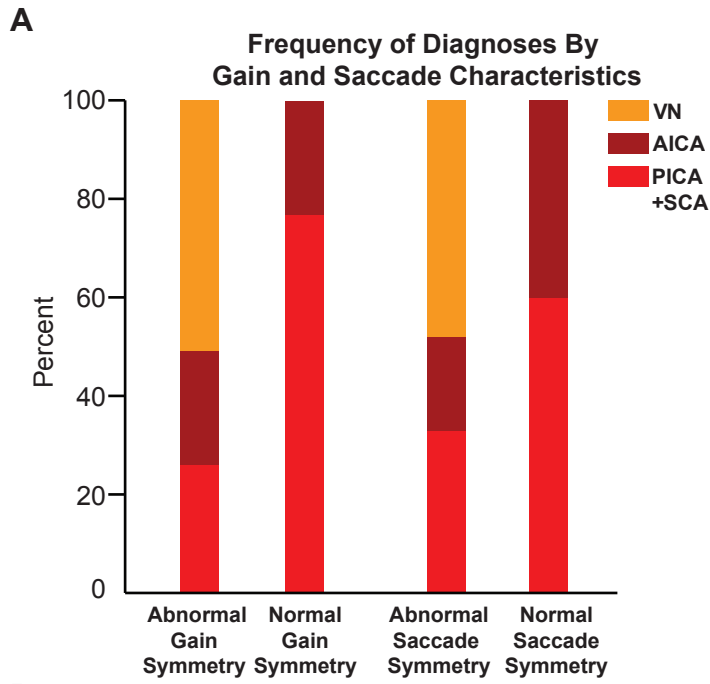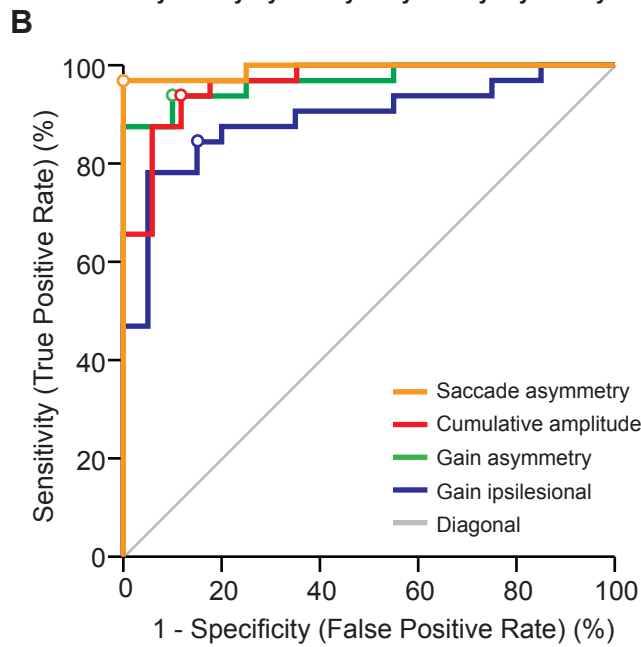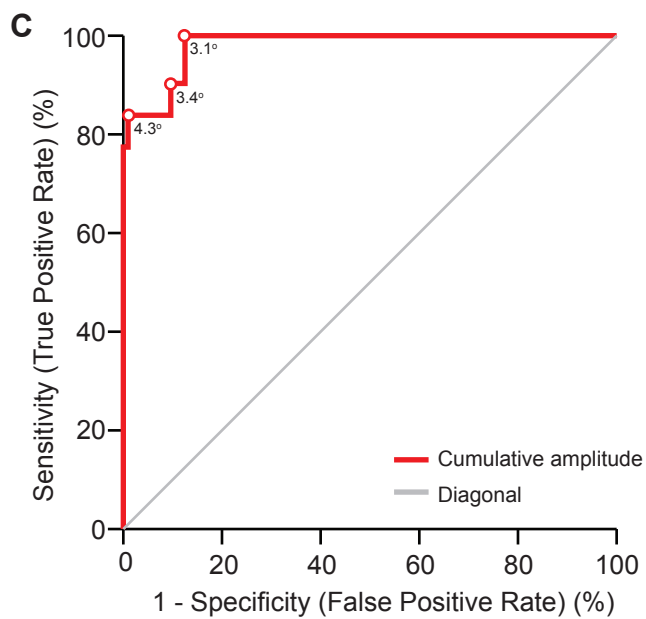

**FIGURE e-3**

Supplement: supp_WNL.0000000000000906_Figure_e-3.pdf [file supp_WNL.0000000000000906_Figure_e-3.pdf]
